# Supplementary material for: Endoscopic Versus Open Lumbar Decompression: A Propensity-Matched National Cohort Study of 50,000 Patients with 90-Day Follow-Up
Source: Research Square preprint supplement (doi:10.21203/rs.3.rs-8244767/v1), 2025-12-18
Supplement: Supplementary file 1 [file 16b9045b8aee82a79525fa70.docx]

**Supplementary Appendix: Endoscopic Versus Open Lumbar Decompression: A Propensity-Matched National Cohort Study of 50,000 Patients with 90-Day Follow-Up**

Dana Hazem,1* Rohit Srinivas,2* Harlene Kaur,3 Rahul Kumar,3 Rohan Phadke,4 Swapna Vaja,5 Nathan J. Lee, MD5

1. Geisel School of Medicine at Dartmouth, Hanover, NH
2. School of Medicine, University of Texas at Southwestern, Dallas, TX
3. T.H. Chan School of Medicine, UMass Chan Medical School, Worcester, Massachusetts
4. School of Medicine, Baylor College of Medicine, Houston, TX
5. Department of Orthopedic Surgery, Rush University Medical Center, Chicago, IL, USA

**Corresponding Author:**

Rahul Kumar; [rahul.kumar5@umassmed.edu](mailto:rahul.kumar5@umassmed.edu);

ORCID: [0000-0001-8574-2895](https://orcid.org/0000-0001-8574-2895)

# **Supplementary Appendix: Endoscopic vs Non-Endoscopic Lumbar Decompression**

## **A. Cohort Selection**

### **Cohort 1: Endoscopic Lumbar Decompression (ENDO)**

· Inclusion Criteria

· Age ≥ 18 years

· Lumbar decompression identified by CPT 62380 or ICD-10-PCS percutaneous endoscopic codes:

· 0SB24ZZ – Excision, lumbar intervertebral disc, percutaneous endoscopic

· 0SB34ZZ – Excision, lumbar vertebra, percutaneous endoscopic

· 0SB40ZZ – Release, lumbar spinal cord, percutaneous endoscopic

· 0SB44ZZ – Release, lumbar spinal nerve, percutaneous endoscopic

· 0SB54ZZ – Division, lumbar vertebra, percutaneous endoscopic

· Degenerative spinal indication within 90 days pre-index (ICD-10: M48.06, M54.16, M47.26, M51.26, etc.)

· Index event = day of endoscopic procedure

· Exclusion Criteria

· Any concurrent open decompression (CPT 63030, 63047) or fusion (CPT 22630, 22633)

· Fracture, tumor, infection, or deformity diagnosis within 1 year pre-index

### **Cohort 2: Non-Endoscopic (Open) Lumbar Decompression (NON-ENDO)**

· Inclusion Criteria

· Age ≥ 18 years

· Conventional lumbar decompression (CPT 63030 or 63047)

· Degenerative lumbar indication within 90 days pre-index

· Exclusion Criteria

· CPT 62380 or any endoscopic PCS code

· Fusion or tumor/fracture/infection/deformity diagnoses within 1 year

## **B. Index Setup**

• Index date: date of decompression procedure

• Follow-up windows: 30 days and 90 days post-index

• Data range: 2017–2025 (TriNetX Research Network, United States)

## **C. Propensity Score Matching**

• 1:1 greedy nearest-neighbor matching (caliper = 0.2 SD)

• Covariates: age, sex, race/ethnicity, year of surgery, hypertension, diabetes, obesity, hyperlipidemia, CKD, COPD, CHF, CAD/MI, smoking, surgical indication

• Cohort size after matching: ENDO = 25,242; NON-ENDO = 25,242

## **D. Outcome Definitions**

| **Outcome** | **Definition** | **ICD-10 / CPT / PCS Codes** |
| --- | --- | --- |
| Incidental durotomy | Accidental dural tear during procedure | G97.41, G96.11 |
| CSF leak / pseudomeningocele | Post-op CSF leak or pseudomeningocele | G96.0x, G96.198, G96.81x |
| Unplanned reoperation | Repeat decompression within 90 days | CPT 63030, 63035, 63047, 63048 |
| Meningitis | Post-op bacterial/viral/unspecified meningitis | G00.x, A87.x, G03.x |
| Superficial SSI | Infection following the procedure, superficial | T81.41 |
| Deep SSI | Infection following the procedure, deep incisional | T81.42 |
| Wound disruption/dehiscence | Post-op wound disruption | T81.3x |
| Deep vein thrombosis | Acute embolism/thrombosis of lower-extremity veins | I82.4x |
| Myocardial infarction | Acute MI (I21.x) – binary presence within 90 days | I21.x |
| Healthcare utilization | ED visit or inpatient readmission within 90 days | Encounter type = ED/Inpatient |
| Mortality (if available) | All-cause death within 90 days | TriNetX mortality flag = true |

## **E. Composite Definitions**

• Dural complication composite: durotomy + CSF leak + pseudomeningocele

• Infectious composite: meningitis + SSI (superficial/deep) + wound disruption

• Vascular complication composite: DVT + MI
